# Supplementary material for: Deactivation of the GATA Transcription Factor ELT-2 Is a Major Driver of Normal Aging in C. elegans
Source: PubMed Central journal article supplement (PMC4829211; doi:10.1371/journal.pgen.1005956), 2016-04-12

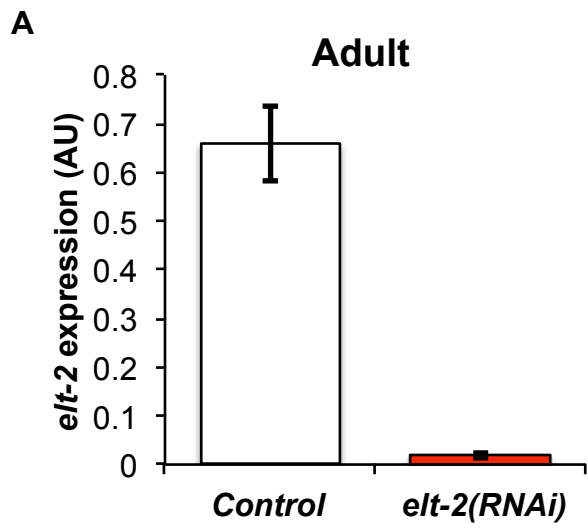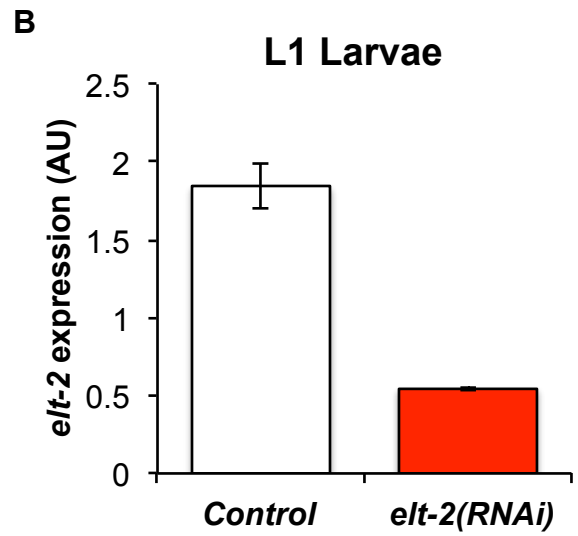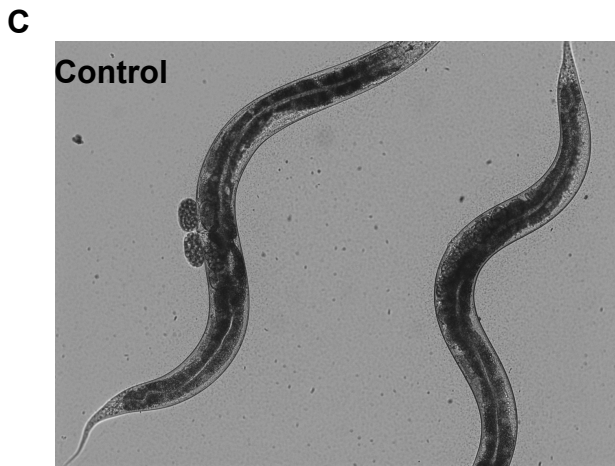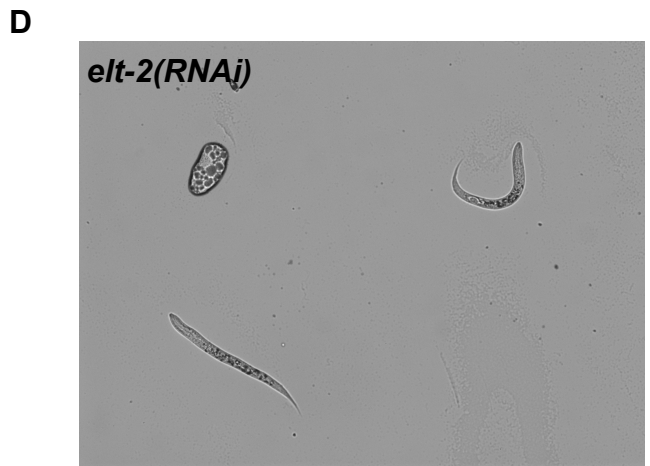

Supplement: pgen.1005956.s003.pdf [file pgen.1005956.s003.pdf]
