# Supplementary material for: Deactivation of the GATA Transcription Factor ELT-2 Is a Major Driver of Normal Aging in C. elegans
Source: PubMed Central journal article supplement (PMC4829211; doi:10.1371/journal.pgen.1005956), 2016-04-12
Supplement: pgen.1005956.s010.pdf [file pgen.1005956.s010.pdf]

**ELT-2 ChIP Targets**

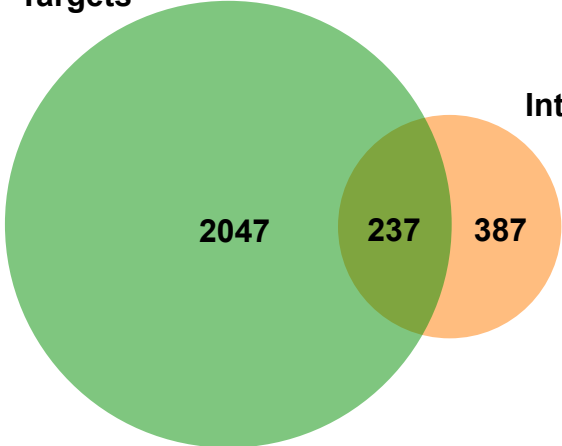

**Intestinally-Enriched Genes**

**3.1-fold enrichment**  
**Hypergeometric  $p = 1.8 \times 10^{-62}$**
